# Supplementary material
Source: PubMed Central journal article supplement (PMC3890150)
Supplement: NIHMS368316-supplement-Supp_Material.pdf [file NIHMS368316-supplement-Supp_Material.pdf]

Web-based Supplementary Materials for “Bayesian Model Selection For Incomplete Data using the Posterior Predictive Distribution” by Michael J. Daniels, Arkendu S. Chatterjee, and Chenguang Wang

## 1 Web Appendix A

### Derivation of PPL for $h(\mathbf{y})$ with full data

Consider the loss function

$$\mathcal{L}\{h(\mathbf{y}_{\text{rep}}), a; \mathbf{y}\} = L\{h(\mathbf{y}_{\text{rep}}), a\} + kL\{h(\mathbf{y}), a\}$$

When  $L\{\cdot\}$  is squared error loss, the posterior predictive expectation of  $\mathcal{L}$  minimized with respect to the action,  $a$ , is

$$\begin{aligned} C_k(h) &= \sum_i^n \min_{a_i} \text{E} \left[ L\{h(\mathbf{y}_{\text{rep},i}), a_i\} + kL\{h(\mathbf{y}_i), a_i\} \right] \\ &= \sum_i^n \min_{a_i} \text{E} \left[ \{h(\mathbf{y}_{\text{rep},i}) - a_i\}^2 + k\{h(\mathbf{y}_i) - a_i\}^2 \mid \mathbf{y} \right] \\ &= \sum_{i=1}^n \text{Var}\{h(\mathbf{y}_{\text{rep},i}) \mid \mathbf{y}\} + \sum_{i=1}^n \min_{a_i} \left[ \text{E}\{h(\mathbf{y}_{\text{rep},i}) \mid \mathbf{y}\} - a_i\}^2 + k\{h(\mathbf{y}_i) - a_i\}^2 \right] \end{aligned} \quad (1)$$

The value of  $a_i$  that minimizes (1) is

$$a_i = \frac{1}{1+k} \left[ \text{E}\{h(\mathbf{y}_{\text{rep},i}) \mid \mathbf{y}\} + kh(\mathbf{y}_i) \right].$$

### Derivation of PPL for $h(\mathbf{y})$ with incomplete data

Consider the loss function

$$\mathcal{L}\{h(\mathbf{y}_{\text{rep}}), a; h(\mathbf{y})\} = L\{h(\mathbf{y}_{\text{rep}}); a\} + kL\{h(\mathbf{y}); a\}$$

When  $L\{\cdot\}$  is squared error loss, the posterior predictive expectation of  $\mathcal{L}$  minimized with respect to the action,  $a$ , is

$$\begin{aligned} C_k(h) &= \sum_{i=1}^n \min_{a_i} \left[ \text{E}\{(h(\mathbf{y}_{\text{rep},i}) - a_i)^2 \mid \mathbf{y}_{\text{obs}}, \mathbf{r}\} + k \text{E}\{(h(\mathbf{y}_i) - a_i)^2 \mid \mathbf{y}_{\text{obs}}, \mathbf{r}\} \right] \\ &= \sum_{i=1}^n \text{Var}\{h(\mathbf{y}_{\text{rep},i}) \mid \mathbf{y}_{\text{obs}}, \mathbf{r}\} + k \sum_{i=1}^n \text{Var}\{h(\mathbf{y}_i) \mid \mathbf{y}_{\text{obs}}, \mathbf{r}\} \\ &\quad + \sum_{i=1}^n \min_{a_i} \left[ \{E(h(\mathbf{y}_{\text{rep},i}) \mid \mathbf{y}_{\text{obs}}) - a_i\}^2 + k\{E(h(\mathbf{y}_i) \mid \mathbf{y}_{\text{obs}}) - a_i\}^2 \right]. \end{aligned} \quad (2)$$

The value of  $a_i$  that minimizes (2) is

$$a_i = \frac{1}{1+k} \left[ \mathbb{E}\{h(\mathbf{y}_{\text{rep},i})|\mathbf{y}_{\text{obs}}, \mathbf{r}\} + k \mathbb{E}\{h(\mathbf{y}_i)|\mathbf{y}_{\text{obs}}, \mathbf{r}\} \right].$$

After substituting the value of  $a$ , we obtain

$$\begin{aligned} C_h(k) = & \sum_{i=1}^n \text{Var}\{h(\mathbf{y}_{\text{rep},i})|\mathbf{y}_{\text{obs}}, \mathbf{r}\} + k \sum_{i=1}^n \text{Var}\{h(\mathbf{y}_i)|\mathbf{y}_{\text{obs}}, \mathbf{r}\} \\ & + \frac{k}{1+k} \sum_{i=1}^n \left[ \mathbb{E}\{h(\mathbf{y}_i)|\mathbf{y}_{\text{obs}}, \mathbf{r}\} - \mathbb{E}\{h(\mathbf{y}_{\text{rep},i})|\mathbf{y}_{\text{obs}}, \mathbf{r}\} \right]^2. \end{aligned}$$

### Proof of Theorem I:

To prove Theorem I, we will examine each of the three terms individually. First we note that the condition that  $p(\omega)$  and  $p(\mathbf{y}_{\text{obs}}, \mathbf{r}; \omega_O)$  are the same ensures  $p(\omega|\mathbf{y}_{\text{obs}}, \mathbf{r})$  is the same for both models. For clarity and conciseness in the below, we let  $o = \text{obs}$  and  $m = \text{mis}$ .

*Term 3:* Clearly, under the conditions in the Theorem,  $\mathbb{E}\{h(\mathbf{y})|\mathbf{y}_O, \mathbf{r}\}$  is the same for a degenerate and non-degenerate model. We now show that  $\mathbb{E}\{h(\mathbf{y}_{\text{rep}})|\mathbf{y}_{\text{obs}}, \mathbf{r}\}$  is equal as well.

$$\begin{aligned} \mathbb{E}\{h(\mathbf{y}_{\text{rep}})|\mathbf{y}_O, \mathbf{r}\} &= \int h(\mathbf{y}_{\text{rep}})p(\mathbf{y}_{\text{rep}}|\mathbf{y}_O, \mathbf{r})d\mathbf{y}_{\text{rep}} \\ &= \int \int \int \int h(\mathbf{y}_{\text{rep}})p(\mathbf{y}_{\text{rep},m}|\mathbf{y}_{\text{rep},o}, \mathbf{r}_{\text{rep}}, \omega)p(\mathbf{y}_{\text{rep},o}|\mathbf{r}_{\text{rep}}, \omega)p(\mathbf{r}_{\text{rep}}|\omega) \\ &\quad p(\omega|\mathbf{y}_O, \mathbf{r})d\omega d\mathbf{r}_{\text{rep}}d\mathbf{y}_{\text{rep},o}d\mathbf{y}_{\text{rep},m} \\ &= \int \int \int \mathbb{E}\{h(\mathbf{y}_{\text{rep}})|\mathbf{y}_{\text{rep},o}, \mathbf{r}_{\text{rep}}, \omega\}p(\mathbf{y}_{\text{rep},o}|\mathbf{r}_{\text{rep}}, \omega)p(\mathbf{r}_{\text{rep}}|\omega) \\ &\quad p(\omega|\mathbf{y}_O, \mathbf{r})d\omega d\mathbf{r}_{\text{rep}}d\mathbf{y}_{\text{rep},o} \\ &= \int \int \int \mathbb{E}\left\{h(\mathbf{y}_{\text{rep},o}, \mathbb{E}(\mathbf{y}_{\text{rep},m}|\mathbf{y}_{\text{rep},o}, \mathbf{r}_{\text{rep}}, \omega))|\mathbf{y}_{\text{rep},o}, \mathbf{r}_{\text{rep}}, \omega\right\}p(\mathbf{y}_{\text{rep},o}|\mathbf{r}_{\text{rep}}, \omega) \\ &\quad p(\mathbf{r}_{\text{rep}}|\omega)p(\omega|\mathbf{y}_O, \mathbf{r})d\omega d\mathbf{r}_{\text{rep}}d\mathbf{y}_{\text{rep},o}. \end{aligned}$$

The conditional expectation,  $\mathbb{E}(\mathbf{y}_{\text{rep},m}|\mathbf{y}_{\text{rep},o}, \mathbf{r}_{\text{rep}}, \omega)$  is the same under the degenerate and non-degenerate models and the other terms in the integrand are the same under both models.

*Term 1:*

Given that we showed for Term 3 that  $\mathbb{E}\{h(\mathbf{y}_{\text{rep}})|\mathbf{y}_{\text{obs}}, \mathbf{r}\}$  is the same for both cases, we just need to show that  $\mathbb{E}\{h^2(\mathbf{y}_{\text{rep}})|\mathbf{y}_{\text{obs}}, \mathbf{r}\}$  is the same or larger in the non-degenerate (ND) model as the degenerate model. Using a similar development to Term 3, for the degenerate (D) model we have the following expectation (taken with respect to  $p(\mathbf{y}_{\text{rep},m}|\mathbf{y}_{\text{rep},o}, \mathbf{r}_{\text{rep}}, \omega)$ ),

$$\begin{aligned}
E_D\{h^2(\mathbf{y}_{\text{rep}})|\mathbf{y}_{\text{rep,o}}, \mathbf{r}_{\text{rep}}, \omega\} &= E_D\{h^2(\mathbf{y}_{\text{rep,o}}, \mathbf{y}_{\text{rep,m}})|\mathbf{y}_{\text{rep,o}}, \mathbf{r}_{\text{rep}}, \omega\} \\
&= E_D\left\{h^2(\mathbf{y}_{\text{rep,o}}, E(\mathbf{y}_{\text{rep,m}}|\mathbf{y}_{\text{rep,o}}, \mathbf{r}_{\text{rep}}, \omega))|\mathbf{y}_{\text{rep,o}}, \mathbf{r}_{\text{rep}}, \omega\right\} \\
&= \text{Var}_D\left\{h(\mathbf{y}_{\text{rep,o}}, E(\mathbf{y}_{\text{rep,m}}|\mathbf{y}_{\text{rep,o}}, \mathbf{r}_{\text{rep}}, \omega))|\mathbf{y}_{\text{rep,o}}, \mathbf{r}_{\text{rep}}, \omega\right\} \\
&\quad + \left[E_D\left\{h(\mathbf{y}_{\text{rep,o}}, E(\mathbf{y}_{\text{rep,m}}|\mathbf{y}_{\text{rep,o}}, \mathbf{r}_{\text{rep}}, \omega))|\mathbf{y}_{\text{rep,o}}, \mathbf{r}_{\text{rep}}, \omega\right\}\right]^2 \\
&= 0 + \left[E_D\left\{h(\mathbf{y}_{\text{rep,o}}, E(\mathbf{y}_{\text{rep,m}}|\mathbf{y}_{\text{rep,o}}, \mathbf{r}_{\text{rep}}, \omega))|\mathbf{y}_{\text{rep,o}}, \mathbf{r}_{\text{rep}}, \omega\right\}\right]^2 \\
&\leq \text{Var}_{ND}\{h(\mathbf{y}_{\text{rep,o}}, \mathbf{y}_{\text{rep,m}})|\mathbf{y}_{\text{rep,o}}, \mathbf{r}_{\text{rep}}, \omega\} \\
&\quad + \left[E_D\{h(\mathbf{y}_{\text{rep,o}}, E(\mathbf{y}_{\text{rep,m}}|\mathbf{y}_{\text{rep,o}}, \mathbf{r}_{\text{rep}}, \omega))|\mathbf{y}_{\text{rep,o}}, \mathbf{r}_{\text{rep}}, \omega\}\right]^2 \\
&= E_{ND}\{h^2(\mathbf{y}_{\text{rep}})|\mathbf{y}_{\text{rep,o}}, \mathbf{r}_{\text{rep}}, \omega\}
\end{aligned}$$

The expression following the last inequality holds given the equality of the expectations

$$E\{h(\mathbf{y}_{\text{rep}})|\mathbf{y}_{\text{rep,o}}, \mathbf{r}_{\text{rep}}, \omega\}$$

between the degenerate and non-degenerate models.

*Term 2:* Clearly,  $\text{Var}\{h(\mathbf{y})|\mathbf{y}_{\text{obs}}, \mathbf{r}\}$  is equal to zero if  $p(\mathbf{y}_{\text{mis}}|\mathbf{y}_{\text{obs}}, \mathbf{r})$  is degenerate. If  $p(\mathbf{y}_{\text{mis}}|\mathbf{y}_{\text{obs}}, \mathbf{r})$  is not degenerate, then this term will be positive.

## 2 Web Appendix B

### Table S.1: Growth Hormone Trial

| Treatment | $s$ | $n_s$ | Month   |         |         |
|-----------|-----|-------|---------|---------|---------|
|           |     |       | 0       | 6       | 12      |
| EG        | 1   | 12    | 58 (26) |         |         |
|           | 2   | 4     | 57 (15) | 68 (26) |         |
|           | 3   | 22    | 78 (24) | 90 (32) | 88 (32) |
|           | All | 38    | 69 (25) | 87 (32) | 88 (32) |
| EP        | 1   | 7     | 65 (32) |         |         |
|           | 2   | 2     | 87 (52) | 86 (51) |         |
|           | 3   | 31    | 65 (24) | 81 (25) | 73 (21) |
|           | All | 40    | 66 (26) | 82 (26) | 73 (21) |

Table S.1: Growth hormone trial: quadriceps strength means (standard deviations) for treatment groups Exercise + Growth Hormone (EG) and Exercise + Placebo (EP) at months 0, 6 and 12. Missing pattern  $s = \{1, 2, 3\}$  corresponds to the last observation obtained at month 0, 6, or 12, respectively.  $n_s$  is the number of participants with missing pattern  $s$ .

| Model | $p_D$ | $\overline{\text{Deviance}}$ | $\text{DIC}_o$ |
|-------|-------|------------------------------|----------------|
| SM    | 23.4  | 5.6                          | 29.1           |
| MM1   | 30.7  | 10.6                         | 41.3           |
| MM2   | 25.4  | 26.4                         | 51.8           |

Table S.2: DIC based on observed data likelihood ( $\text{DIC}_o$ ), posterior mean deviance ( $\overline{\text{Deviance}}$ ), and effective number of parameters ( $p_D$ ) for the growth hormone data analysis in Section 4 for Selection Model (SM), Mixture Model 1 (MM1), and Mixture Model 2 (MM2).

### 3 Web Appendix C

Closed form expectations for the mixture model in Section 4 for several choices of  $T(\cdot)$

Recall  $S = \sum_{j=1}^3 r_j$ . First, we derive the expectations for  $T(\mathbf{r}, \mathbf{r} \circ \mathbf{y}) = r_3 y_3 - r_1 y_1$ .

$$\begin{aligned} \mathbb{E}_{\mathbf{y}_{\text{rep}}, \mathbf{r}_{\text{rep}} | \omega} (r_3 y_3 - r_1 y_1) &= \mathbb{E}_{\mathbf{r}_{\text{rep}} | \omega} (r_3 \mathbb{E}_{\mathbf{y}_{\text{rep}} | \mathbf{r}_{\text{rep}}, \omega} y_3 - r_1 \mathbb{E}_{\mathbf{y}_{\text{rep}} | \mathbf{r}_{\text{rep}}, \omega} y_1) \\ &= \mathbb{E}_{\mathbf{r}_{\text{rep}} | \omega} (r_3 \mu_3^{(s)} - r_1 \mu_1^{(s)}) \\ &= \eta_3 \mu_3^{(3)} - \mu_1 \end{aligned}$$

where,  $\mu_1 = \sum_{s=1}^3 \eta_s \mu_1^{(s)}$  and

$$\begin{aligned} \mu_3^{(3)} &= \mathbb{E}(Y_3 | S = 3) \\ &= \alpha_3 + \alpha_2 \phi_{32} + (\phi_{31} + \phi_{32} \phi_{21}) \mu_1^{(3)}. \end{aligned}$$

$$\begin{aligned} \mathbb{E}_{\mathbf{y}_{\text{rep}}, \mathbf{r}_{\text{rep}} | \omega} \{(r_3 y_3 - r_1 y_1)^2\} &= \mathbb{E}_{\mathbf{r}_{\text{rep}} | \omega} \mathbb{E}_{\mathbf{y}_{\text{rep}} | \mathbf{r}_{\text{rep}}, \omega} \{(r_3 y_3 - r_1 y_1)^2\} \\ &= \mathbb{E}_{\mathbf{r}_{\text{rep}} | \omega} \mathbb{E}_{\mathbf{y}_{\text{rep}} | \mathbf{r}_{\text{rep}}, \omega} \{(r_3^2 y_3^2) + (r_1^2 y_1^2) - 2r_1 r_3 y_1 y_3\} \\ &= \mathbb{E}_{\mathbf{r}_{\text{rep}} | \omega} \left\{ r_3^2 \mathbb{E}_{\mathbf{y}_{\text{rep}} | \mathbf{r}_{\text{rep}}, \omega} (y_3^2) + r_1^2 \mathbb{E}_{\mathbf{y}_{\text{rep}} | \mathbf{r}_{\text{rep}}, \omega} (y_1^2) \right. \\ &\quad \left. - 2r_1 r_3 \mathbb{E}_{\mathbf{y}_{\text{rep}} | \mathbf{r}_{\text{rep}}, \omega} (y_1 y_3) \right\} \\ &= \eta_3 (V_{33} + \mu_3^{(3)2}) + \sum_{s=1}^3 \eta_s (\sigma_1^{(s)2} + \mu_1^{(s)2}) \\ &\quad - 2\eta_3 \{(\phi_{31} + \phi_{32} \phi_{21}) \sigma_1^{(3)2} + \mu_1^{(3)} \mu_3^{(3)}\} \end{aligned}$$

where  $V_{33} = \text{Var}(Y_3 | S = 3) = (\phi_{31}^2 + \phi_{32}^2 \phi_{21}^2 + 2\phi_{31} \phi_{32} \phi_{21}) \sigma_1^{(3)2} + \phi_{32}^2 \tau_2^2 + \tau_3^2$ .

Now we derive the expectations for  $T(\mathbf{r}, \mathbf{r} \circ \mathbf{y}) = r_3(r_3 y_3 - r_1 y_1)$ .

$$\mathbb{E}_{\mathbf{y}_{\text{rep}}, \mathbf{r}_{\text{rep}} | \omega} \{r_3(r_3 y_3 - r_1 y_1)\} = \eta_3 (\mu_3^{(3)} - \mu_1^{(3)})$$

$$\begin{aligned} \mathbb{E}_{\mathbf{y}_{\text{rep}}, \mathbf{r}_{\text{rep}} | \omega} \{r_3(y_3 - y_1)\}^2 &= \mathbb{E}_{\mathbf{y}_{\text{rep}}, \mathbf{r}_{\text{rep}} | \omega} (r_3 y_3^2 + r_3 y_1^2 - 2r_3 y_3 y_1) \\ &= \eta_3 (V_{33} + \mu_3^{(3)2}) + \eta_3 (\sigma_1^{(3)2} + \mu_1^{(3)2}) \\ &\quad - 2\eta_3 \{(\phi_{31} + \phi_{32} \phi_{21}) \sigma_1^{(3)2} + \mu_1^{(3)} \mu_3^{(3)}\}. \end{aligned}$$

### 4 Web Appendix D

#### Simulation Study Results

| Model                              | $p_D$ | $\overline{\text{Deviance}}$ | $\text{DIC}_o$ |
|------------------------------------|-------|------------------------------|----------------|
| True Model: SM0, Sample Size: 50   |       |                              |                |
| SM0                                | 23.6  | 1245.8                       | 1269.4         |
| MM1                                | 42.0  | 1253.5                       | 1295.6         |
| MM2                                | 35.8  | 1285.8                       | 1321.6         |
| True Model: SM0, Sample Size: 100  |       |                              |                |
| SM0                                | 23.8  | 2493.9                       | 2517.7         |
| MM1                                | 34.4  | 2501.6                       | 2536.0         |
| MM2                                | 28.7  | 2567.8                       | 2596.5         |
| True Model: SM0, Sample Size: 2000 |       |                              |                |
| SM0                                | 24.0  | 49801.6                      | 49825.6        |
| MM1                                | 34.4  | 49944.7                      | 49979.1        |
| MM2                                | 29.4  | 51238.4                      | 51267.8        |
| True Model: MM1, Sample Size: 50   |       |                              |                |
| SM0                                | 22.3  | 1372.0                       | 1394.3         |
| MM1                                | 39.9  | 1261.0                       | 1300.9         |
| MM2                                | 35.5  | 1575.3                       | 1610.8         |
| True Model: MM1, Sample Size: 100  |       |                              |                |
| SM0                                | 23.2  | 2745.4                       | 2768.6         |
| MM1                                | 34.0  | 2516.5                       | 2550.4         |
| MM2                                | 28.6  | 3146.6                       | 3175.2         |
| True Model: MM1, Sample Size: 2000 |       |                              |                |
| SM0                                | 23.9  | 54889.6                      | 54913.5        |
| MM1                                | 34.1  | 50274.5                      | 50308.6        |
| MM2                                | 29.3  | 62820.4                      | 62849.7        |
| True Model: MM2, Sample Size: 50   |       |                              |                |
| SM0                                | 22.2  | 1380.5                       | 1402.7         |
| MM1                                | 40.2  | 1262.6                       | 1302.8         |
| MM2                                | 33.6  | 1265.1                       | 1298.7         |
| True Model: MM2, Sample Size: 100  |       |                              |                |
| SM0                                | 23.2  | 2760.9                       | 2784.1         |
| MM1                                | 33.9  | 2517.0                       | 2550.9         |
| MM2                                | 28.2  | 2520.1                       | 2548.3         |
| True Model: MM2, Sample Size: 2000 |       |                              |                |
| SM0                                | 24.0  | 55232.5                      | 55256.4        |
| MM1                                | 34.2  | 50253.8                      | 50287.9        |
| MM2                                | 29.4  | 50256.9                      | 50286.2        |

Table S.3: For simulating (true) model being MAR Selection model (SM0), Mixture model 1 (MM1) and Mixture model 2 (MM2) and sample size being 50, 100 and 20000, average (over 200 replications) DIC based on observed data likelihood ( $\text{DIC}_o$ ), posterior mean deviance ( $\overline{\text{Deviance}}$ ), and effective number of parameters ( $p_D$ ). 6

| Model                                                                                                                                 | GOF       | Complexity  | $C_\infty$   |
|---------------------------------------------------------------------------------------------------------------------------------------|-----------|-------------|--------------|
| $T(\mathbf{r}, \mathbf{r} \circ \mathbf{y}) = r_J y_J - r_1 y_1$                                                                      |           |             |              |
| SM0                                                                                                                                   | 41.2(4.7) | 41.6(4.2)   | 82.8(8.7)    |
| MM1                                                                                                                                   | 41.2(4.7) | 49.6(6.8)   | 90.8(10.0)   |
| MM2                                                                                                                                   | 41.8(4.8) | 53.8(7.8)   | 95.6(11.2)   |
| $T(\mathbf{r}, \mathbf{r} \circ \mathbf{y}) = r_J(r_J y_J - r_1 y_1)$                                                                 |           |             |              |
| SM0                                                                                                                                   | 8.4(1.3)  | 8.9(1.3)    | 17.3(2.5)    |
| MM1                                                                                                                                   | 8.4(1.3)  | 10.0(1.5)   | 18.5(2.7)    |
| MM2                                                                                                                                   | 9.0(1.6)  | 10.5(1.8)   | 19.6(3.3)    |
| $T(\mathbf{r}, \mathbf{r} \circ \mathbf{y}) = \sum_{j=1}^J I\{r_j = 1, r_{j+1} = 0\} r_j y_j - I\{r_2 = 1\} r_1 y_1$                  |           |             |              |
| SM0                                                                                                                                   | 30.6(5.0) | 31.0(4.8)   | 61.6(9.6)    |
| MM1                                                                                                                                   | 30.6(5.0) | 37.0(5.1)   | 67.5(9.6)    |
| MM2                                                                                                                                   | 31.3(5.1) | 35.7(4.7)   | 67.0(9.0)    |
| $T(\mathbf{r}, \mathbf{r} \circ \mathbf{y}) = \left[ \sum_{j=1}^J I\{r_j = 1, r_{j+1} = 0\} r_j y_j - I\{r_2 = 1\} r_1 y_1 \right]^2$ |           |             |              |
| SM0                                                                                                                                   | 2151(660) | 2162(527)   | 4313(1104)   |
| MM1                                                                                                                                   | 2179(652) | 7038(12083) | 9217(12052)  |
| MM2                                                                                                                                   | 2185(648) | 8370(18109) | 10555(18059) |

Table S.4: Simulating (true) model MAR Selection model (SM0) and sample size 50: average PPL criteria and SD (in parenthesis) over 200 replications for four choices of  $T(\mathbf{r}, \mathbf{r} \circ \mathbf{y})$  for models MAR Selection model (SM0), Mixture model 1 (MM1), and Mixture Model 2 (MM2).  $C_\infty$  is the PPL criterion with  $k = \infty$  and GOF is the goodness of fit component of the criterion.

| Model                                                                                                                                 | GOF       | Complexity | $C_\infty$ |
|---------------------------------------------------------------------------------------------------------------------------------------|-----------|------------|------------|
| $T(\mathbf{r}, \mathbf{r} \circ \mathbf{y}) = r_J y_J - r_1 y_1$                                                                      |           |            |            |
| SM0                                                                                                                                   | 41.4(3.7) | 41.7(3.1)  | 83.2(6.5)  |
| MM1                                                                                                                                   | 41.5(3.7) | 43.2(3.5)  | 84.7(7.1)  |
| MM2                                                                                                                                   | 41.9(3.7) | 47.6(4.2)  | 89.5(7.6)  |
| $T(\mathbf{r}, \mathbf{r} \circ \mathbf{y}) = r_J(r_J y_J - r_1 y_1)$                                                                 |           |            |            |
| SM0                                                                                                                                   | 8.7(0.9)  | 8.9(0.9)   | 17.6(1.7)  |
| MM1                                                                                                                                   | 8.7(0.9)  | 9.4(0.9)   | 18.1(1.8)  |
| MM2                                                                                                                                   | 9.2(1.1)  | 10.0(1.1)  | 19.2(2.1)  |
| $T(\mathbf{r}, \mathbf{r} \circ \mathbf{y}) = \sum_{j=1}^J I\{r_j = 1, r_{j+1} = 0\} r_j y_j - I\{r_2 = 1\} r_1 y_1$                  |           |            |            |
| SM0                                                                                                                                   | 30.5(4.0) | 30.8(3.6)  | 61.4(7.5)  |
| MM1                                                                                                                                   | 30.5(4.0) | 33.1(3.9)  | 63.6(7.9)  |
| MM2                                                                                                                                   | 31.1(4.0) | 31.7(3.6)  | 62.8(7.5)  |
| $T(\mathbf{r}, \mathbf{r} \circ \mathbf{y}) = \left[ \sum_{j=1}^J I\{r_j = 1, r_{j+1} = 0\} r_j y_j - I\{r_2 = 1\} r_1 y_1 \right]^2$ |           |            |            |
| SM0                                                                                                                                   | 2122(537) | 2140(397)  | 4263(877)  |
| MM1                                                                                                                                   | 2124(537) | 2566(607)  | 4690(1132) |
| MM2                                                                                                                                   | 2127(536) | 2611(616)  | 4739(1139) |

Table S.5: Simulating (true) model MAR Selection model (SM0) and sample size 100: average PPL criteria and SD (in parenthesis) over 200 replications for four choices of  $T(\mathbf{r}, \mathbf{r} \circ \mathbf{y})$  for models MAR Selection model (SM0), Mixture model 1 (MM1), and Mixture Model 2 (MM2).  $C_\infty$  is the PPL criterion with  $k = \infty$  and GOF is the goodness of fit component of the criterion.



| Model                                                                                                                                 | GOF       | Complexity | $C_\infty$ |
|---------------------------------------------------------------------------------------------------------------------------------------|-----------|------------|------------|
| $T(\mathbf{r}, \mathbf{r} \circ \mathbf{y}) = r_J y_J - r_1 y_1$                                                                      |           |            |            |
| SM0                                                                                                                                   | 41.7(0.8) | 41.8(0.7)  | 83.4(1.5)  |
| MM1                                                                                                                                   | 41.7(0.8) | 41.0(0.9)  | 82.7(1.7)  |
| MM2                                                                                                                                   | 42.0(0.8) | 45.2(1.0)  | 87.2(1.8)  |
| $T(\mathbf{r}, \mathbf{r} \circ \mathbf{y}) = r_J(r_J y_J - r_1 y_1)$                                                                 |           |            |            |
| SM0                                                                                                                                   | 8.7(0.2)  | 8.8(0.2)   | 17.5(0.4)  |
| MM1                                                                                                                                   | 8.8(0.2)  | 8.8(0.2)   | 17.6(0.4)  |
| MM2                                                                                                                                   | 9.0(0.3)  | 9.3(0.2)   | 18.4(0.4)  |
| $T(\mathbf{r}, \mathbf{r} \circ \mathbf{y}) = \sum_{j=1}^J I\{r_j = 1, r_{j+1} = 0\} r_j y_j - I\{r_2 = 1\} r_1 y_1$                  |           |            |            |
| SM0                                                                                                                                   | 30.8(1.0) | 30.8(0.9)  | 61.6(1.8)  |
| MM1                                                                                                                                   | 30.8(1.0) | 31.5(1.0)  | 62.4(1.9)  |
| MM2                                                                                                                                   | 31.2(1.0) | 30.1(1.0)  | 61.3(1.9)  |
| $T(\mathbf{r}, \mathbf{r} \circ \mathbf{y}) = \left[ \sum_{j=1}^J \{I(r_j = 1, r_{j+1} = 0) r_j y_j\} - I(r_2 = 1) r_1 y_1 \right]^2$ |           |            |            |
| SM0                                                                                                                                   | 2116(127) | 2126(103)  | 4242(216)  |
| MM1                                                                                                                                   | 2117(127) | 2145(130)  | 4262(254)  |
| MM2                                                                                                                                   | 2120(127) | 2186(133)  | 4305(257)  |

Table S.6: Simulating (true) model MAR Selection model (SM0) and sample size 2000: average PPL criteria and SD (in parenthesis) over 200 replications for four choices of  $T(\mathbf{r}, \mathbf{r} \circ \mathbf{y})$  for models MAR Selection model (SM0), Mixture model 1 (MM1), and Mixture Model 2 (MM2).  $C_\infty$  is the PPL criterion with  $k = \infty$  and GOF is the goodness of fit component of the criterion.

| Model                                                                                                                                                   | GOF              | Complexity       | $C_\infty$       |
|---------------------------------------------------------------------------------------------------------------------------------------------------------|------------------|------------------|------------------|
| $T(\mathbf{r}, \mathbf{r} \circ \mathbf{y}) = r_J y_J - r_1 y_1$                                                                                        |                  |                  |                  |
| SM0                                                                                                                                                     | 1095.9(67.9)     | 1097.9(63.2)     | 2193.8(129.6)    |
| MM1                                                                                                                                                     | 1094.4(68.1)     | 1105.7(67.4)     | 2200.1(135.2)    |
| MM2                                                                                                                                                     | 1662.4(243.7)    | 1852.6(657.9)    | 3515.0(690.0)    |
| $T(\mathbf{r}, \mathbf{r} \circ \mathbf{y}) = r_J(r_J y_J - r_1 y_1)$                                                                                   |                  |                  |                  |
| SM0                                                                                                                                                     | 266.1(19.1)      | 289.9(23.8)      | 556.0(42.2)      |
| MM1                                                                                                                                                     | 265.7(19.0)      | 271.6(18.8)      | 537.3(37.7)      |
| MM2                                                                                                                                                     | 833.8(251.4)     | 1071.7(314.9)    | 1905.6(480.9)    |
| $T(\mathbf{r}, \mathbf{r} \circ \mathbf{y}) = \sum_{j=1}^J \{\mathbf{I}(r_j = 1, r_{j+1} = 0) r_j y_j\} - \mathbf{I}(r_2 = 1) r_1 y_1$                  |                  |                  |                  |
| SM0                                                                                                                                                     | 413.0(47.6)      | 443.2(48.0)      | 856.2(94.1)      |
| MM1                                                                                                                                                     | 411.3(47.3)      | 421.6(45.4)      | 832.9(92.1)      |
| MM2                                                                                                                                                     | 1184.5(312.0)    | 1388.6(270.3)    | 2573.2(460.6)    |
| $T(\mathbf{r}, \mathbf{r} \circ \mathbf{y}) = \left[ \sum_{j=1}^J \{\mathbf{I}(r_j = 1, r_{j+1} = 0) r_j y_j\} - \mathbf{I}(r_2 = 1) r_1 y_1 \right]^2$ |                  |                  |                  |
| SM0                                                                                                                                                     | 296118(32710)    | 356876(49052)    | 652994(78363)    |
| MM1                                                                                                                                                     | 294008(32332)    | 328074(73249)    | 622082(93555)    |
| MM2                                                                                                                                                     | 1722024(1986146) | 5537388(4892633) | 7259412(6795196) |

Table S.7: Simulating (true) model Mixture model 1 (MM1) and sample size 50: average PPL criteria and SD (in parenthesis) over 200 replications for four choices of  $T(\mathbf{r}, \mathbf{r} \circ \mathbf{y})$  for models MAR Selection model (SM0), Mixture model 1 (MM1), and Mixture Model 2 (MM2).  $C_\infty$  is the PPL criterion with  $k = \infty$  and GOF is the goodness of fit component of the criterion.

| Model                                                                                                                                                   | GOF              | Complexity       | $C_\infty$       |
|---------------------------------------------------------------------------------------------------------------------------------------------------------|------------------|------------------|------------------|
| $T(\mathbf{r}, \mathbf{r} \circ \mathbf{y}) = r_J y_J - r_1 y_1$                                                                                        |                  |                  |                  |
| SM0                                                                                                                                                     | 1104.2(50.7)     | 1105.8(46.2)     | 2210.0(96.2)     |
| MM1                                                                                                                                                     | 1102.8(50.9)     | 1107.0(50.1)     | 2209.9(100.9)    |
| MM2                                                                                                                                                     | 1607.3(207.1)    | 1734.7(459.2)    | 3342.0(456.6)    |
| $T(\mathbf{r}, \mathbf{r} \circ \mathbf{y}) = r_J(r_J y_J - r_1 y_1)$                                                                                   |                  |                  |                  |
| SM0                                                                                                                                                     | 267.6(13.3)      | 290.0(15.7)      | 557.5(28.7)      |
| MM1                                                                                                                                                     | 267.3(13.3)      | 270.1(12.9)      | 537.4(26.1)      |
| MM2                                                                                                                                                     | 771.0(204.6)     | 963.8(205.7)     | 1734.8(330.4)    |
| $T(\mathbf{r}, \mathbf{r} \circ \mathbf{y}) = \sum_{j=1}^J \{\mathbf{I}(r_j = 1, r_{j+1} = 0) r_j y_j\} - \mathbf{I}(r_2 = 1) r_1 y_1$                  |                  |                  |                  |
| SM0                                                                                                                                                     | 415.0(32.8)      | 444.1(33.7)      | 859.1(65.3)      |
| MM1                                                                                                                                                     | 413.4(32.5)      | 417.5(32.3)      | 830.9(64.5)      |
| MM2                                                                                                                                                     | 1092.3(270.7)    | 1214.1(233.7)    | 2306.4(410.1)    |
| $T(\mathbf{r}, \mathbf{r} \circ \mathbf{y}) = \left[ \sum_{j=1}^J \{\mathbf{I}(r_j = 1, r_{j+1} = 0) r_j y_j\} - \mathbf{I}(r_2 = 1) r_1 y_1 \right]^2$ |                  |                  |                  |
| SM0                                                                                                                                                     | 297395(23936)    | 352048(31864)    | 649442(53299)    |
| MM1                                                                                                                                                     | 295418(23730)    | 303460(22823)    | 598878(46048)    |
| MM2                                                                                                                                                     | 1151272(1048539) | 3579020(2478676) | 4730292(3481461) |

Table S.8: Simulating (true) model Mixture model 1 (MM1) and sample size 100: average PPL criteria and SD (in parenthesis) over 200 replications for four choices of  $T(\mathbf{r}, \mathbf{r} \circ \mathbf{y})$  for models MAR Selection model (SM0), Mixture model 1 (MM1), and Mixture Model 2 (MM2).  $C_\infty$  is the PPL criterion with  $k = \infty$  and GOF is the goodness of fit component of the criterion.

| Model                                                                                                                                                   | GOF             | Complexity      | $C_\infty$      |
|---------------------------------------------------------------------------------------------------------------------------------------------------------|-----------------|-----------------|-----------------|
| $T(\mathbf{r}, \mathbf{r} \circ \mathbf{y}) = r_J y_J - r_1 y_1$                                                                                        |                 |                 |                 |
| SM0                                                                                                                                                     | 1114.3(11.4)    | 1114.1(10.4)    | 2228.4(21.4)    |
| MM1                                                                                                                                                     | 1113.2(11.4)    | 1113.7(11.6)    | 2226.8(22.7)    |
| MM2                                                                                                                                                     | 1601.5(195.4)   | 1644.6(374.1)   | 3246.1(183.6)   |
| $T(\mathbf{r}, \mathbf{r} \circ \mathbf{y}) = r_J(r_J y_J - r_1 y_1)$                                                                                   |                 |                 |                 |
| SM0                                                                                                                                                     | 270.3(3.0)      | 291.6(3.5)      | 561.9(6.4)      |
| MM1                                                                                                                                                     | 270.0(3.0)      | 270.2(3.1)      | 540.2(5.9)      |
| MM2                                                                                                                                                     | 758.6(194.6)    | 873.7(60.4)     | 1632.3(143.2)   |
| $T(\mathbf{r}, \mathbf{r} \circ \mathbf{y}) = \sum_{j=1}^J \{\mathbf{I}(r_j = 1, r_{j+1} = 0) r_j y_j\} - \mathbf{I}(r_2 = 1) r_1 y_1$                  |                 |                 |                 |
| SM0                                                                                                                                                     | 418.9(7.6)      | 445.6(7.7)      | 864.5(14.8)     |
| MM1                                                                                                                                                     | 417.5(7.5)      | 417.7(7.6)      | 835.2(14.9)     |
| MM2                                                                                                                                                     | 1074.9(267.2)   | 1354.4(114.8)   | 2429.3(160.3)   |
| $T(\mathbf{r}, \mathbf{r} \circ \mathbf{y}) = \left[ \sum_{j=1}^J \{\mathbf{I}(r_j = 1, r_{j+1} = 0) r_j y_j\} - \mathbf{I}(r_2 = 1) r_1 y_1 \right]^2$ |                 |                 |                 |
| SM0                                                                                                                                                     | 299940(5617)    | 350146(7537)    | 650086(12618)   |
| MM1                                                                                                                                                     | 298273(5586)    | 298677(5512)    | 596950(10869)   |
| MM2                                                                                                                                                     | 1019003(348422) | 2908665(176399) | 3927667(480104) |

Table S.9: Simulating (true) model Mixture model 1 (MM1) and sample size 2000: average PPL criteria and SD (in parenthesis) over 200 replications for four choices of  $T(\mathbf{r}, \mathbf{r} \circ \mathbf{y})$  for models MAR Selection model (SM0), Mixture model 1 (MM1), and Mixture Model 2 (MM2).  $C_\infty$  is the PPL criterion with  $k = \infty$  and GOF is the goodness of fit component of the criterion.

| Model                                                                                                                               | GOF           | Complexity    | $C_\infty$      |
|-------------------------------------------------------------------------------------------------------------------------------------|---------------|---------------|-----------------|
| $T(\mathbf{r}, \mathbf{r} \circ \mathbf{y}) = r_J y_J - r_1 y_1$                                                                    |               |               |                 |
| SM0                                                                                                                                 | 1626.4(91.9)  | 1657.1(85.7)  | 3283.5(176.2)   |
| MM1                                                                                                                                 | 1624.2(92.3)  | 1635.7(90.7)  | 3259.9(182.8)   |
| MM2                                                                                                                                 | 1624.8(92.2)  | 1635.3(91.0)  | 3260.1(182.5)   |
| $T(\mathbf{r}, \mathbf{r} \circ \mathbf{y}) = r_J(r_J y_J - r_1 y_1)$                                                               |               |               |                 |
| SM0                                                                                                                                 | 499.7(26.4)   | 541.2(32.2)   | 1040.9(57.7)    |
| MM1                                                                                                                                 | 499.1(26.3)   | 505.8(25.8)   | 1004.9(51.9)    |
| MM2                                                                                                                                 | 499.7(26.2)   | 505.1(25.4)   | 1004.8(50.9)    |
| $T(\mathbf{r}, \mathbf{r} \circ \mathbf{y}) = \sum_{j=1}^J \{I(r_j = 1, r_{j+1} = 0)r_j y_j\} - I(r_2 = 1)r_1 y_1$                  |               |               |                 |
| SM0                                                                                                                                 | 394.5(44.0)   | 448.6(45.2)   | 843.1(86.7)     |
| MM1                                                                                                                                 | 393.9(43.8)   | 403.3(43.7)   | 797.2(86.8)     |
| MM2                                                                                                                                 | 394.6(43.8)   | 402.7(43.5)   | 797.3(86.3)     |
| $T(\mathbf{r}, \mathbf{r} \circ \mathbf{y}) = \left[ \sum_{j=1}^J \{I(r_j = 1, r_{j+1} = 0)r_j y_j\} - I(r_2 = 1)r_1 y_1 \right]^2$ |               |               |                 |
| SM0                                                                                                                                 | 484041(46637) | 585615(69484) | 1069657(111360) |
| MM1                                                                                                                                 | 480156(46125) | 515598(55962) | 995754(99057)   |
| MM2                                                                                                                                 | 482642(46208) | 512871(56387) | 995514(97830)   |

Table S.10: Simulating (true) model Mixture model 2 (MM2) and sample size 50: average PPL criteria and SD (in parenthesis) over 200 replications for four choices of  $T(\mathbf{r}, \mathbf{r} \circ \mathbf{y})$  for models MAR Selection model (SM0), Mixture model 1 (MM1), and Mixture Model 2 (MM2).  $C_\infty$  is the PPL criterion with  $k = \infty$  and GOF is the goodness of fit component of the criterion.

| Model                                                                                                                               | GOF           | Complexity    | $C_\infty$     |
|-------------------------------------------------------------------------------------------------------------------------------------|---------------|---------------|----------------|
| $T(\mathbf{r}, \mathbf{r} \circ \mathbf{y}) = r_J y_J - r_1 y_1$                                                                    |               |               |                |
| SM0                                                                                                                                 | 1655.1(66.9)  | 1683.5(59.6)  | 3338.6(125.5)  |
| MM1                                                                                                                                 | 1653.6(67.3)  | 1657.3(66.8)  | 3310.9(133.9)  |
| MM2                                                                                                                                 | 1653.8(67.3)  | 1656.6(66.8)  | 3310.4(133.9)  |
| $T(\mathbf{r}, \mathbf{r} \circ \mathbf{y}) = r_J(r_J y_J - r_1 y_1)$                                                               |               |               |                |
| SM0                                                                                                                                 | 506.1(18.9)   | 546.2(22.2)   | 1052.3(40.5)   |
| MM1                                                                                                                                 | 505.7(18.8)   | 508.6(18.4)   | 1014.3(37.0)   |
| MM2                                                                                                                                 | 506.0(18.9)   | 507.9(18.4)   | 1014.0(37.0)   |
| $T(\mathbf{r}, \mathbf{r} \circ \mathbf{y}) = \sum_{j=1}^J \{I(r_j = 1, r_{j+1} = 0)r_j y_j\} - I(r_2 = 1)r_1 y_1$                  |               |               |                |
| SM0                                                                                                                                 | 408.7(32.3)   | 460.2(30.3)   | 868.8(61.2)    |
| MM1                                                                                                                                 | 408.2(32.1)   | 411.3(31.2)   | 819.5(62.9)    |
| MM2                                                                                                                                 | 408.5(32.2)   | 410.9(31.4)   | 819.5(63.2)    |
| $T(\mathbf{r}, \mathbf{r} \circ \mathbf{y}) = \left[ \sum_{j=1}^J \{I(r_j = 1, r_{j+1} = 0)r_j y_j\} - I(r_2 = 1)r_1 y_1 \right]^2$ |               |               |                |
| SM0                                                                                                                                 | 495264(33281) | 585498(43762) | 1080763(74380) |
| MM1                                                                                                                                 | 491650(32949) | 504644(32542) | 996295(64911)  |
| MM2                                                                                                                                 | 492923(33312) | 502432(33131) | 995355(65514)  |

Table S.11: Simulating (true) model Mixture model 2 (MM2) and sample size 100: average PPL criteria and SD (in parenthesis) over 200 replications for four choices of  $T(\mathbf{r}, \mathbf{r} \circ \mathbf{y})$  for models MAR Selection model (SM0), Mixture model 1 (MM1), and Mixture Model 2 (MM2).  $C_\infty$  is the PPL criterion with  $k = \infty$  and GOF is the goodness of fit component of the criterion.

| Model                                                                                                                               | GOF          | Complexity    | $C_\infty$     |
|-------------------------------------------------------------------------------------------------------------------------------------|--------------|---------------|----------------|
| $T(\mathbf{r}, \mathbf{r} \circ \mathbf{y}) = r_J y_J - r_1 y_1$                                                                    |              |               |                |
| SM0                                                                                                                                 | 1669.6(14.0) | 1699.4(13.5)  | 3369.0(27.1)   |
| MM1                                                                                                                                 | 1668.4(14.0) | 1668.3(15.1)  | 3336.7(28.7)   |
| MM2                                                                                                                                 | 1668.4(14.0) | 1668.5(14.8)  | 3337.0(28.5)   |
| $T(\mathbf{r}, \mathbf{r} \circ \mathbf{y}) = r_J(r_J y_J - r_1 y_1)$                                                               |              |               |                |
| SM0                                                                                                                                 | 511.4(4.0)   | 552.0(5.0)    | 1063.3(8.8)    |
| MM1                                                                                                                                 | 511.0(4.0)   | 511.2(4.3)    | 1022.3(8.1)    |
| MM2                                                                                                                                 | 511.1(4.0)   | 511.2(4.2)    | 1022.3(8.0)    |
| $T(\mathbf{r}, \mathbf{r} \circ \mathbf{y}) = \sum_{j=1}^J \{I(r_j = 1, r_{j+1} = 0)r_j y_j\} - I(r_2 = 1)r_1 y_1$                  |              |               |                |
| SM0                                                                                                                                 | 409.3(6.6)   | 462.0(7.3)    | 871.3(13.4)    |
| MM1                                                                                                                                 | 409.1(6.5)   | 409.1(7.0)    | 818.3(13.2)    |
| MM2                                                                                                                                 | 409.1(6.5)   | 409.3(6.7)    | 818.4(13.0)    |
| $T(\mathbf{r}, \mathbf{r} \circ \mathbf{y}) = \left[ \sum_{j=1}^J \{I(r_j = 1, r_{j+1} = 0)r_j y_j\} - I(r_2 = 1)r_1 y_1 \right]^2$ |              |               |                |
| SM0                                                                                                                                 | 497319(7482) | 580996(10900) | 1078315(17886) |
| MM1                                                                                                                                 | 494065(7360) | 494774(7606)  | 988839(14647)  |
| MM2                                                                                                                                 | 494143(7369) | 494568(7702)  | 988711(14752)  |

Table S.12: Simulating (true) model Mixture model 2 (MM2) and sample size 2000: average PPL criteria and SD (in parenthesis) over 200 replications for four choices of  $T(\mathbf{r}, \mathbf{r} \circ \mathbf{y})$  for models MAR Selection model (SM0), Mixture model 1 (MM1), and Mixture Model 2 (MM2).  $C_\infty$  is the PPL criterion with  $k = \infty$  and GOF is the goodness of fit component of the criterion.
